# Supplementary material for: Percutaneous Coronary Intervention in Patients Without Acute Myocardial Infarction in China: Results From the China PEACE Prospective Study of Percutaneous Coronary Intervention
Source: PubMed Central journal article supplement (PMC6324328; doi:10.1001/jamanetworkopen.2018.5446), 2018-12-14
Supplement: jamanetwopen-1-e185446-s001.pdf [file jamanetwopen-1-e185446-s001.pdf]

## Supplementary Online Content

Lu Y, Zhang H, Wang Y, et al. Percutaneous coronary intervention in patients without acute myocardial infarction in China: results from the China PEACE Prospective Study of Percutaneous Coronary Intervention. *JAMA Netw Open*. 2018;1(8):e185446. doi:10.1001/jamanetworkopen.2018.5446

**eTable 1.** Comparison of Patients Included in Analysis and Patients Excluded Due to Missing Data on SAQ Angina Frequency and Quality-of-Life at 1 Year

**eTable 2.** Baseline Demographic, Medical History, Clinical Presentation, and Health Status Characteristics, Overall and Compared Between Patients With and Without Clinically Significant Improvement of SAQ Angina Frequency and Quality-of-Life Over 1 Year

**eTable 3.** SAQ Score With and Without Adjusting for Missing Data

**eFigure 1.** Flowchart of Study Population Selection

**eFigure 2.** Density Plot of 1-Year Change in SAQ Angina Frequency and Quality-of-Life Scores

This supplementary material has been provided by the authors to give readers additional information about their work.

**eTable 1. Comparison of patients included in analysis and patients excluded due to missing data on SAQ Angina Frequency and Quality-of-Life at 1 year<sup>a</sup>**

| Characteristics                                   | Total<br>(N = 2242) | Patients<br>included in the<br>analysis<br>(n = 1611) | Patients<br>excluded due to<br>missing data on<br>angina<br>frequency or<br>quality of life<br>(n = 631) | P value |
|---------------------------------------------------|---------------------|-------------------------------------------------------|----------------------------------------------------------------------------------------------------------|---------|
| <b>Sociodemographics characteristics, No. (%)</b> |                     |                                                       |                                                                                                          |         |
| Age, y: Mean (SD)                                 | 62.3 (10.0)         | 61.3 (9.8)                                            | 64.8 (10.2)                                                                                              | <.001   |
| Female                                            | 749 (33.4)          | 520 (32.3)                                            | 229 (36.3)                                                                                               | 0.07    |
| Marriage Status                                   |                     |                                                       |                                                                                                          |         |
| Married                                           | 2031 (90.6)         | 1489 (92.4)                                           | 542 (85.9)                                                                                               | <.001   |
| Divorced or separated                             | 31 (1.4)            | 23 (1.4)                                              | 8 (1.3)                                                                                                  |         |
| Widowed                                           | 160 (7.1)           | 93 (5.8)                                              | 67 (10.6)                                                                                                |         |
| High school education                             | 313 (14.0)          | 239 (14.8)                                            | 74 (11.7)                                                                                                | <.001   |
| Health insurance                                  |                     |                                                       |                                                                                                          |         |
| Public health service                             | 70 (3.1)            | 56 (3.5)                                              | 14 (2.2)                                                                                                 | 0.15    |
| Medical insurance for urban worker or resident    | 1391 (62.0)         | 1014 (62.9)                                           | 377 (59.8)                                                                                               |         |
| Rural cooperative medical service                 | 672 (30.0)          | 461 (28.6)                                            | 211 (33.4)                                                                                               |         |
| Other                                             | 87 (3.9)            | 62 (3.9)                                              | 25 (4.0)                                                                                                 |         |
| No insurance                                      | 19 (0.9)            | 16 (1.0)                                              | 3 (0.5)                                                                                                  |         |
| <b>Cardiovascular risk factors, No. (%)</b>       |                     |                                                       |                                                                                                          |         |
| Diabetes mellitus                                 | 674 (30.1)          | 469 (29.1)                                            | 205 (32.5)                                                                                               | 0.12    |
| Hypertension                                      | 1548 (69.1)         | 1103 (68.5)                                           | 445 (70.5)                                                                                               | 0.34    |
| Dyslipidemia                                      | 1116 (49.8)         | 819 (50.8)                                            | 297 (47.1)                                                                                               | 0.11    |
| Current smoker                                    | 830 (37.0)          | 606 (37.6)                                            | 224 (35.5)                                                                                               | 0.35    |
| Body mass index, median <sup>a</sup> (IQR)        | 25 (22.7-27.1)      | 25 (23.0-27.1)                                        | 25 (22.0-27.0)                                                                                           | 0.04    |
| Body mass index <sup>a</sup>                      |                     |                                                       |                                                                                                          |         |
| ≤28                                               | 1527 (68.1)         | 1116 (69.3)                                           | 411 (65.1)                                                                                               | <.001   |
| >28                                               | 316 (14.1)          | 241 (15.0)                                            | 75 (11.9)                                                                                                |         |
| Waist circumference, median (IQR), cm             | 90 (82.0-95.5)      | 90 (83.0-95.5)                                        | 88 (80.0-95.3)                                                                                           | 0.03    |
| <b>Coexisting Conditions, No. (%)</b>             |                     |                                                       |                                                                                                          |         |
| Acute heart failure                               | 18 (0.8)            | 15 (0.9)                                              | 3 (0.5)                                                                                                  | 0.28    |
| Acute Stroke                                      | 53 (2.4)            | 35 (2.2)                                              | 18 (2.9)                                                                                                 | 0.34    |
| Fluid retention (lower extremity edema)           | 135 (6.0)           | 84 (5.2)                                              | 51 (8.1)                                                                                                 | 0.01    |
| Pneumonia                                         | 84 (3.8)            | 53 (3.3)                                              | 31 (4.9)                                                                                                 | 0.07    |
| <b>Medical history, No. (%)</b>                   |                     |                                                       |                                                                                                          |         |
| Prior myocardial infarction                       | 375 (16.7)          | 260 (16.1)                                            | 115 (18.2)                                                                                               | 0.23    |
| Prior coronary artery bypass graft                | 15 (0.7)            | 12 (0.7)                                              | 3 (0.5)                                                                                                  | 0.48    |
| Prior PCI                                         | 373 (16.6)          | 264 (16.4)                                            | 109 (17.3)                                                                                               | 0.61    |
| Prior heart failure                               | 773 (34.5)          | 560 (34.8)                                            | 213 (33.8)                                                                                               | 0.65    |
| Prior angina pectoris                             | 283 (12.6)          | 218 (13.5)                                            | 65 (10.3)                                                                                                | 0.04    |
| Prior stroke                                      | 356 (15.9)          | 227 (14.1)                                            | 129 (20.4)                                                                                               | <.001   |

Abbreviations: IQR, interquartile range; PCI, percutaneous coronary intervention

a: Calculated as weight in kilograms divided by height in meters squared.

**eTable 2. Baseline demographic, medical history, clinical presentation, and health status characteristics, overall and compared between patients with and without clinically significant improvement of SAQ Angina Frequency and Quality-of-Life over 1 year<sup>a</sup>**

| Characteristics                                  | Total<br>(N = 1611) | SAQ Angina Frequency                    |                                       | P value | SAQ Quality of Life                     |                                      | P value |
|--------------------------------------------------|---------------------|-----------------------------------------|---------------------------------------|---------|-----------------------------------------|--------------------------------------|---------|
|                                                  |                     | No significant improvement<br>(n = 400) | Significant improvement<br>(n = 1211) |         | No significant improvement<br>(n = 795) | Significant improvement<br>(n = 816) |         |
| <b>Sociodemographic characteristics, No. (%)</b> |                     |                                         |                                       |         |                                         |                                      |         |
| Age, y: Mean (SD)                                | 61.3 (9.8)          | 60.6 (9.8)                              | 61.5 (9.8)                            | 0.10    | 61.2 (9.8)                              | 61.4 (9.8)                           | 0.64    |
| Female                                           | 520 (32.3)          | 126 (31.5)                              | 394 (32.5)                            | 0.70    | 252 (31.7)                              | 268 (32.8)                           | 0.62    |
| Marriage Status                                  |                     |                                         |                                       | 0.22    |                                         |                                      | 0.04    |
| Married                                          | 1489 (92.4)         | 378 (94.5)                              | 1111 (91.7)                           |         | 724 (91.1)                              | 765 (93.8)                           |         |
| Divorced or separated                            | 23 (1.4)            | 4 (1.0)                                 | 19 (1.6)                              |         | 13 (1.6)                                | 10 (1.2)                             |         |
| Widowed                                          | 93 (5.8)            | 18 (4.5)                                | 75 (6.2)                              |         | 52 (6.5)                                | 41 (5.0)                             |         |
| High school education                            | 239 (14.8)          | 70 (17.5)                               | 169 (14.0)                            | 0.08    | 118 (14.8)                              | 121 (14.8)                           | 0.16    |
| Health insurance                                 |                     |                                         |                                       | 0.21    |                                         |                                      | 0.38    |
| Public health service                            | 56 (3.5)            | 19 (4.8)                                | 37 (3.1)                              |         | 30 (3.8)                                | 26 (3.2)                             |         |
| Medical insurance for urban worker or resident   | 1014 (62.9)         | 248 (62.0)                              | 766 (63.3)                            |         | 512 (64.4)                              | 502 (61.5)                           |         |
| Rural cooperative medical service                | 461 (28.6)          | 106 (26.5)                              | 355 (29.3)                            |         | 218 (27.4)                              | 243 (29.8)                           |         |
| Other                                            | 62 (3.8)            | 21 (5.3)                                | 41 (3.4)                              |         | 26 (3.3)                                | 36 (4.4)                             |         |
| No insurance                                     | 16 (1.0)            | 5 (1.3)                                 | 11 (0.9)                              |         | 7 (0.9)                                 | 9 (1.1)                              |         |
| <b>Cardiovascular risk factors, No. (%)</b>      |                     |                                         |                                       |         |                                         |                                      |         |
| Diabetes mellitus                                | 469 (29.1)          | 142 (35.5)                              | 327 (27)                              | 0.001   | 249 (31.3)                              | 220 (27.0)                           | 0.05    |

|                                            |                |                |                |      |                |                |       |
|--------------------------------------------|----------------|----------------|----------------|------|----------------|----------------|-------|
| Hypertension                               | 1103 (68.5)    | 270 (67.5)     | 833 (68.8)     | 0.63 | 534 (67.2)     | 569 (69.7)     | 0.27  |
| Dyslipidemia                               | 819 (50.8)     | 204 (51.0)     | 615 (50.8)     | 0.94 | 389 (48.9)     | 430 (52.7)     | 0.13  |
| Current smoker                             | 606 (37.6)     | 164 (41.0)     | 442 (36.5)     | 0.11 | 309 (38.9)     | 297 (36.4)     | 0.31  |
| Body mass index, median <sup>a</sup> (IQR) | 25 (23.0-27.1) | 25 (23.3-27.3) | 25 (22.9-27.1) | 0.37 | 25 (23.1-27.0) | 25 (22.9-27.3) | 0.96  |
| Body mass index <sup>a</sup>               |                |                |                | 0.24 |                |                | 0.38  |
| ≤28                                        | 1116 (69.3)    | 265 (66.3)     | 851 (70.3)     |      | 559 (70.3)     | 557 (68.3)     |       |
| >28                                        | 241 (15.0)     | 62 (15.5)      | 179 (14.8)     |      | 109 (13.7)     | 132 (16.2)     |       |
| Waist circumference, median (IQR), cm      | 90 (83.0-95.5) | 90 (85.0-97.0) | 90 (82.5-95.0) | 0.01 | 90 (83.0-95.0) | 90 (82.0-96.0) | 0.44  |
| <b>Coexisting Conditions, No. (%)</b>      |                |                |                |      |                |                |       |
| Acute heart failure                        | 15 (0.9)       | 1 (0.3)        | 14 (1.2)       | 0.10 | 8 (1.0)        | 7 (0.9)        | 0.76  |
| Acute Stroke                               | 35 (2.2)       | 9 (2.3)        | 26 (2.1)       | 0.90 | 16 (2.0)       | 19 (2.3)       | 0.66  |
| Fluid retention (lower extremity edema)    | 84 (5.2)       | 17 (4.3)       | 67 (5.5)       | 0.32 | 44 (5.5)       | 40 (4.9)       | 0.57  |
| Pneumonia                                  | 53 (3.3)       | 11 (2.8)       | 42 (3.5)       | 0.49 | 14 (1.8)       | 39 (4.8)       | <.001 |
| <b>Medical history, No. (%)</b>            |                |                |                |      |                |                |       |
| Prior myocardial infarction                | 260 (16.1)     | 79 (19.8)      | 181 (14.9)     | 0.02 | 137 (17.2)     | 123 (15.1)     | 0.24  |
| Prior coronary artery bypass graft         | 12 (0.7)       | 1 (0.3)        | 11 (0.9)       | 0.18 | 8 (1.0)        | 4 (0.5)        | 0.23  |
| Prior PCI                                  | 264 (16.4)     | 79 (19.8)      | 185 (15.3)     | 0.04 | 137 (17.2)     | 127 (15.6)     | 0.37  |
| Prior heart failure                        | 560 (34.8)     | 124 (31.0)     | 436 (36.0)     | 0.07 | 252 (31.7)     | 308 (37.7)     | 0.01  |
| Prior angina pectoris                      | 218 (13.5)     | 42 (10.5)      | 176 (14.5)     | 0.04 | 114 (14.3)     | 104 (12.7)     | 0.35  |
| Prior stroke                               | 227 (14.1)     | 63 (15.8)      | 164 (13.5)     | 0.27 | 112 (14.1)     | 115 (14.1)     | 1.00  |
| <b>Vital and laboratory results</b>        |                |                |                |      |                |                |       |

|                                                                      |                   |                   |                   |       |                   |                   |       |
|----------------------------------------------------------------------|-------------------|-------------------|-------------------|-------|-------------------|-------------------|-------|
| Systolic blood pressure, median (IQR), mm Hg                         | 130 (120.0-146.0) | 132 (120.0-150.0) | 130 (120.0-145.0) | 0.18  | 130 (120.0-147.0) | 130 (120.0-146.0) | 0.61  |
| Heart rate on admission, median (IQR), beat/min                      | 70 (64.0-78.0)    | 71 (65.0-78.0)    | 70 (64.0-78.0)    | 0.63  | 71 (64.0-78.0)    | 70 (64.0-78.0)    | 0.54  |
| <b>Electrocardiogram findings, No. (%)</b>                           |                   |                   |                   |       |                   |                   |       |
| Rhythm on electrocardiogram                                          |                   |                   |                   |       |                   |                   |       |
| Atrial fibrillation or flutter                                       | 37 (2.3)          | 9 (2.3)           | 28 (2.3)          | 0.94  | 14 (1.8)          | 23 (2.8)          | 0.16  |
| Ventricular tachycardia                                              | 3 (0.2)           | 0                 | 3 (0.2)           | 0.32  | 1 (0.1)           | 2 (0.2)           | 0.58  |
| Global Registry of Acute Coronary Events risk score, median (IQR)    | 103 (85.0-121.0)  | 102 (83.0-120.0)  | 103 (85.0-121.0)  | 0.60  | 100 (84.0-120.0)  | 105 (86.0-121.0)  | 0.02  |
| Left bundle branch block                                             | 10 (0.6)          | 2 (0.5)           | 8 (0.7)           | 0.72  | 3 (0.4)           | 7 (0.9)           | 0.22  |
| Left ventricular ejection fraction, median (IQR), %                  | 62 (57.0-66.5)    | 61 (57.0-66.0)    | 62 (57.0-67.0)    | 0.49  | 61 (57.0-66.0)    | 62 (58.0-67.0)    | 0.07  |
| Glomerular filtration rate, median (IQR), ml/min/1.73 m <sup>2</sup> | 79 (69.3-91.2)    | 80 (67.9-93.1)    | 79 (69.4-90.8)    | 0.18  | 79 (69.5-91.0)    | 79 (69.0-91.2)    | 0.99  |
| Number of symptoms, median (IQR), No.                                | 2 (1.0-4.0)       | 2 (1.0-3.0)       | 2 (1.0-4.0)       | <.001 | 2 (1.0-3.0)       | 2 (1.0-4.0)       | 0.08  |
| <b>Health status on admission, No. (%)</b>                           |                   |                   |                   |       |                   |                   |       |
| SAQ Physical limitation score, median (IQR)                          | 83 (66.7-100.0)   | 94 (77.8-100.0)   | 81 (63.9-95.8)    | <.001 | 86 (68.1-100.0)   | 83 (63.9-100.0)   | 0.01  |
| SAQ Physical limitation, No. (%)                                     |                   |                   |                   | <.001 |                   |                   | <.001 |
| Minimal (>75)                                                        | 950 (59)          | 294 (73.5)        | 656 (54.2)        |       | 496 (62.4)        | 454 (55.6)        |       |
| Mild (>50 to 75)                                                     | 412 (25.6)        | 76 (19)           | 336 (27.7)        |       | 207 (26)          | 205 (25.1)        |       |
| Moderate (>25 to 50)                                                 | 151 (9.4)         | 10 (2.5)          | 141 (11.6)        |       | 53 (6.7)          | 98 (12)           |       |
| Severe (<=25)                                                        | 98 (6.1)          | 20 (5)            | 78 (6.4)          |       | 39 (4.9)          | 59 (7.2)          |       |

|                                          |                |                  |                |       |                |                |       |
|------------------------------------------|----------------|------------------|----------------|-------|----------------|----------------|-------|
| SAQ Angina stability score, median (IQR) | 25 (0-50.0)    | 50 (50.0-50.0)   | 25 (0-50.0)    | <.001 | 25 (0-50.0)    | 25 (0-50.0)    | <.001 |
| SAQ Angina stability, No. (%)            |                |                  |                | <.001 |                |                | <.001 |
| Much better (>75)                        | 149 (9.2)      | 36 (9)           | 113 (9.3)      |       | 67 (8.4)       | 82 (10)        |       |
| Slightly better (>50 to 75)              | 46 (2.9)       | 11 (2.8)         | 35 (2.9)       |       | 22 (2.8)       | 24 (2.9)       |       |
| Unchanged (50)                           | 505 (31.3)     | 272 (68)         | 233 (19.2)     |       | 290 (36.5)     | 215 (26.3)     |       |
| Slightly worse (25 to <50)               | 408 (25.3)     | 49 (12.3)        | 359 (29.6)     |       | 202 (25.4)     | 206 (25.2)     |       |
| Much worse (<25)                         | 503 (31.2)     | 32 (8)           | 471 (38.9)     |       | 214 (26.9)     | 289 (35.4)     |       |
| SAQ Angina Frequency score, median (IQR) | 60 (40.0-80.0) | 100 (90.0-100.0) | 50 (20.0-70.0) | <.001 | 70 (40.0-90.0) | 60 (30.0-80.0) | <.001 |
| SAQ Angina Frequency, No. (%)            |                |                  |                | <.001 |                |                | <.001 |
| None (100)                               | 289 (17.9)     | 289 (72.3)       | 0 (0)          |       | 184 (23.1)     | 105 (12.9)     |       |
| Monthly (>60 to <100)                    | 418 (25.9)     | 79 (19.8)        | 339 (28)       |       | 217 (27.3)     | 201 (24.6)     |       |
| Weekly (>30 to 60)                       | 514 (31.9)     | 27 (6.8)         | 487 (40.2)     |       | 217 (27.3)     | 297 (36.4)     |       |
| Daily (<=30)                             | 390 (24.2)     | 5 (1.3)          | 385 (31.8)     |       | 177 (22.3)     | 213 (26.1)     |       |
| SAQ Quality of Life score, median (IQR)  | 58 (41.7-75.0) | 67 (50.0-83.3)   | 50 (41.7-66.7) | <.001 | 67 (58.3-83.3) | 42 (33.3-58.3) | <.001 |
| SAQ Quality of Life, No. (%)             |                |                  |                | <.001 |                |                | <.001 |
| Excellent (>75)                          | 447 (27.7)     | 167 (41.8)       | 280 (23.1)     |       | 387 (48.7)     | 60 (7.4)       |       |
| Good (>50 to 75)                         | 649 (40.3)     | 145 (36.3)       | 504 (41.6)     |       | 324 (40.8)     | 325 (39.8)     |       |
| Fair (>25 to 50)                         | 390 (24.2)     | 74 (18.5)        | 316 (26.1)     |       | 74 (9.3)       | 316 (38.7)     |       |
| Very poor to poor (<= 25)                | 125 (7.8)      | 14 (3.5)         | 111 (9.2)      |       | 10 (1.3)       | 115 (14.1)     |       |

Abbreviations: SAQ, Seattle Angina Questionnaire; IQR, interquartile range; PCI, percutaneous coronary intervention.

a: Calculated as weight in kilograms divided by height in meters squared.



**eTable 3. SAQ score with and without adjusting for missing data**

| <b>Characteristics</b>           | <b>Unweighted</b> | <b>Weighted</b>   |
|----------------------------------|-------------------|-------------------|
| <b>Baseline, median (IQR)</b>    |                   |                   |
| Physical limitation at baseline  | 83.3 (66.7-100.0) | 83.3 (63.9-100.0) |
| Angina stability at baseline     | 25 (0-50.0)       | 25 (0-50.0)       |
| Angina frequency at baseline     | 60 (40.0-80.0)    | 60 (40.0-90.0)    |
| Quality of life at baseline      | 58.3 (41.7-75.0)  | 58.3 (41.7-75.0)  |
| <b>12-Months, median (IQR)</b>   |                   |                   |
| Physical limitation at 12-months | 100 (80.6-100.0)  | 97.2 (79.2-100.0) |
| Angina stability at 12-months    | 50 (50.0-50.0)    | 50 (50.0-50.0)    |
| Angina frequency at 12-months    | 100 (90.0-100.0)  | 100 (90.0-100.0)  |
| Quality of life at 12-months     | 66.7 (50.0-87.5)  | 75 (50.0-91.7)    |

Abbreviations: SAQ, Seattle Angina Questionnaire; IQR, interquartile range.

**eFigure 1. Flowchart of study population selection**

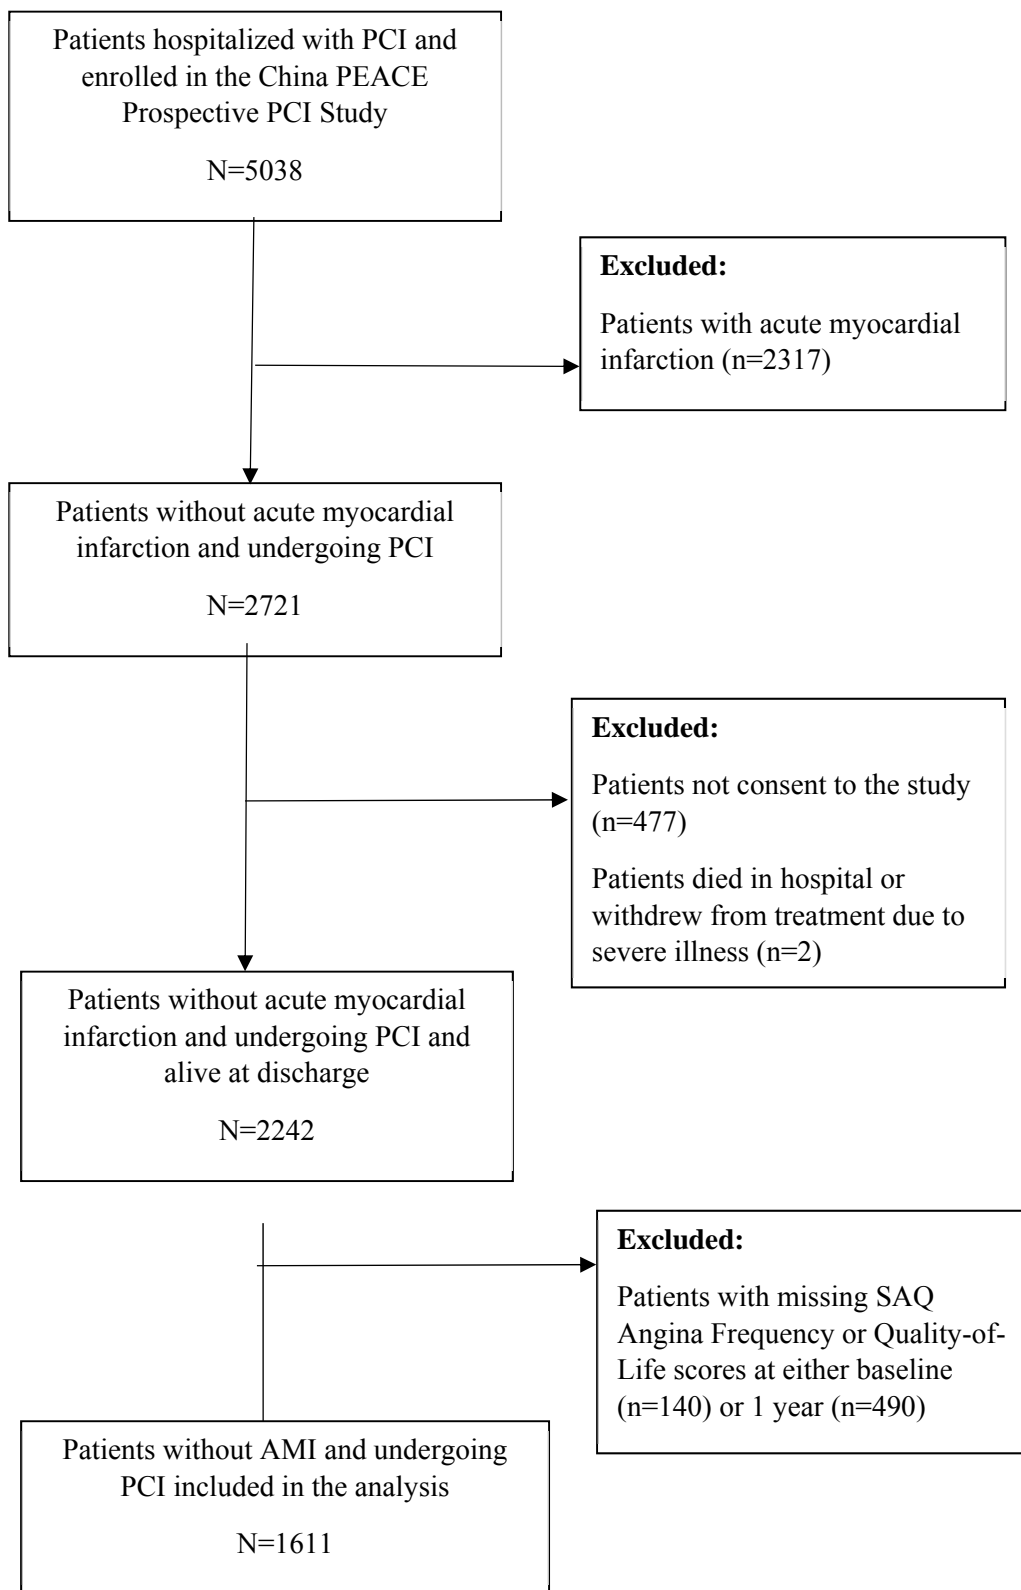

Abbreviation: SAQ, Seattle Angina Questionnaire.

**eFigure 2. Density plot of 1-year change in SAQ Angina Frequency and Quality-of-Life scores**

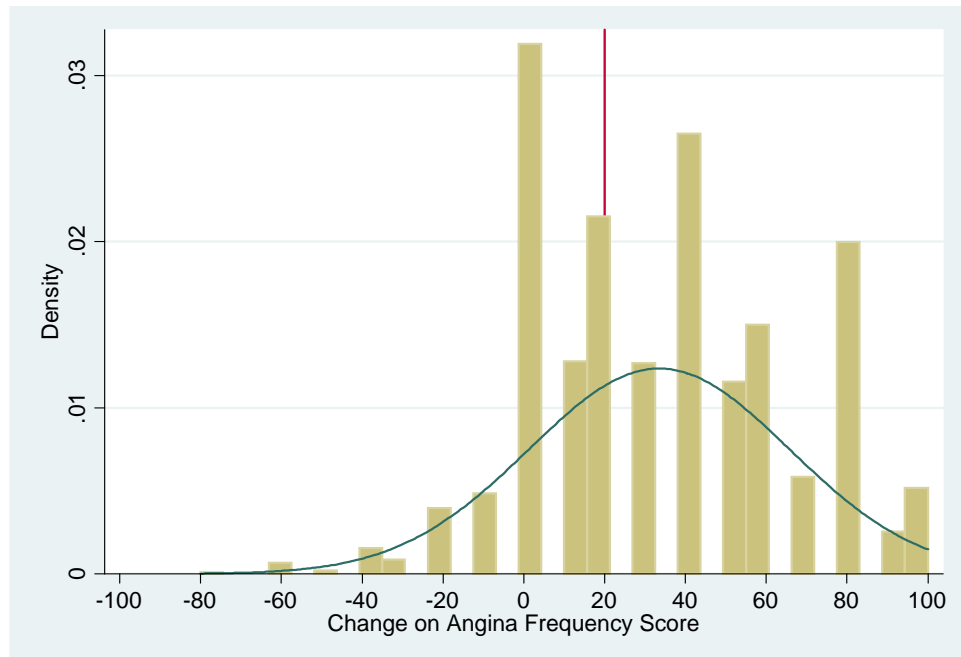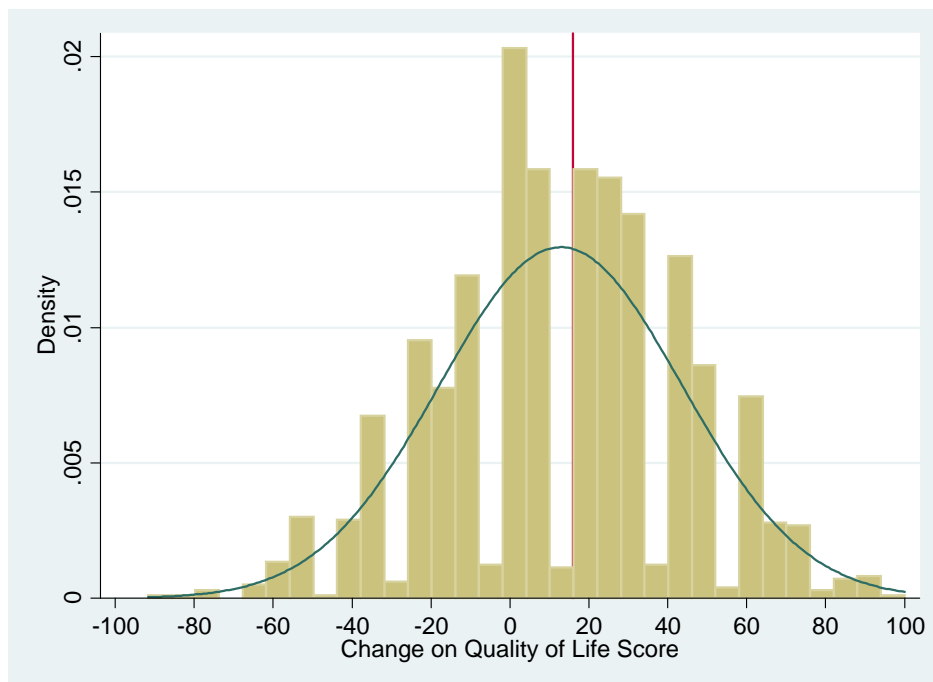

Abbreviation: SAQ, Seattle Angina Questionnaire.
